# Supplementary material for: Nanoassembly of an amphiphilic cyclodextrin and Zn(ii)-phthalocyanine with the potential for photodynamic therapy of cancer
Source: Royal Society of Chemistry journal article supplement (doi:10.1039/c4ra07847k), 2014-01-01
Supplement: c4ra07847k1.pdf [file c4ra07847k1.pdf]

# Nanoassembly of an Amphiphilic Cyclodextrin and Zn(II)-Phthalocyanine with Potential for Photodynamic Therapy of Cancer

Claudia Conte<sup>a</sup>, Angela Scala<sup>b</sup>, Gabriel Siracusano<sup>c</sup>, Nancy Leone<sup>d</sup>, Salvatore Patanè<sup>e</sup>, Francesca Ungaro<sup>a</sup>, Agnese Miro<sup>a</sup>, Maria Teresa Sciortino<sup>c</sup>, Fabiana Quaglia<sup>a\*</sup> and Antonino Mazzaglia<sup>b\*</sup>

<sup>a</sup>Department of Pharmacy, University of Napoli Federico II, Via Domenico Montesano 49,  
80131 Napoli, Italy

<sup>b</sup>CNR-ISMN Institute of Nanostructured Materials c/o Dept of Chemical Sciences of the  
University of Messina, V.le F. Stagno d'Alcontres 31, 98166 Messina, Italy

<sup>c</sup>Department of Biological and Environmental Sciences, University of Messina, Viale F.  
Stagno D'Alcontres 31, 98166, Messina, Italy

<sup>d</sup>CNR-IPCF Institute for Chemical and Physical Processes istituto, V.le F. Stagno  
d'Alcontres 37, Faro Superiore, 98166 Messina, Italy

<sup>e</sup>Department of Matter Physics and Electronic Engineering, University of Messina, V.le F.  
Stagno d'Alcontres 31 – 98166 Messina, Italy

## S.1 Time-resolved fluorescence measurements

The excitation source was a synchronously mode-locked rhodamine 6G dye laser (Spectra Physics 375B) which provided excitation pulses of about 2 ps full width at half-maximum at a repetition rate of 82 MHz. An excitation wavelength of 570 nm was used. The fluorescence pulses were detected with a microchannel-plate photomultiplier (Hamamatsu R1645U-01, about 200 ps rising-time) and the decay profiles at 675 nm were collected with a computer-controlled multi-channel analyzer card (EG&G Ortec Trump-8k/2k). The

collected data were then analyzed using the non linear least-squares iterative reconvolution procedures based on the Marquardt algorithm. In the case of total fluorescence decay curves, the fitting was performed on the basis of the multiexponential decay law, <sup>1</sup>

$$I(t) = I_0 \sum_i \alpha_i \exp(-t / \tau_i) \quad (1)$$

where  $I(t)$  is the total fluorescence decay curve,  $I_0$  is the intensity at time zero, and  $\alpha_i$  and  $\tau_i$  are, respectively, the relative amplitudes and lifetimes of the  $i^{\text{th}}$  component (the normalization condition is  $\sum_i \alpha_i = 1$ ). In the case of time-resolved anisotropy measurements, the reconvolution fitting procedure was

based on two steps. Fluorescence anisotropy  $r(t)$  is defined using the following expression:

$$r(t) = \frac{I_{VV}(t) - I_{VH}(t)}{I_{VV}(t) + 2I_{VH}(t)} = \frac{D(t)}{S(t)} \quad (2)$$

where the sum data,  $S(t)$ , must be equal to the total intensity  $I(t)$ . In some cases, an additive constant  $r_\infty$  to  $r(t)$  was introduced to take into account a long decay contribution due to static interaction with large clusters. In the simple case of spherical molecules, each rotational correlation time,  $\tau_{Rj}$ , is related to the volume ( $V_j$ ) of the rotating unit (or of the equivalent sphere) by the following equation:<sup>2</sup>

$$\tau_{Rj} = \frac{\eta V_j}{k_B T} \quad (3)$$

where  $\eta$  is the microviscosity of the medium,  $T$  is the temperature in Kelvin, and  $k_B$  is the Boltzmann constant.

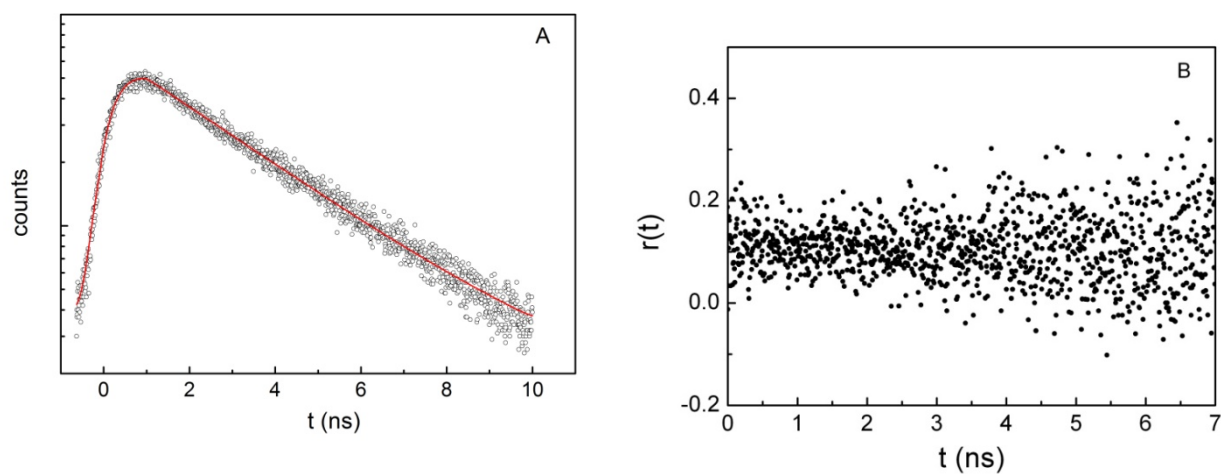

**Figure S1.** (A) Fluorescence time decay of ZnPc/SC16OH nanoassemblies dispersed in water ( $\lambda_{\text{exc}}=570$  nm;  $\lambda_{\text{em}}=675$  nm). The continuous red curve is the fit resulting from the convolution of the fluorescence decay and the excitation. (B) Time-resolved fluorescence anisotropy of ZnPc/SC16OH nanoassemblies dispersed in water (ZnPc concentration was fixed at  $0.25 \mu\text{g/mL}$ ).

## S.2 Depolarized fluorescence spectra

Depolarized fluorescence spectra were measured by using Equation (4):<sup>3</sup>

$$r = \frac{I_{VV}I_{HH} - I_{VH}I_{HV}}{I_{VV}I_{HH} + 2I_{VH}I_{HV}} \quad (4)$$

where  $r$  is the anisotropy and  $I_{VV}$ ,  $I_{HH}$ ,  $I_{VH}$ , and  $I_{HV}$  are the fluorescence intensities registered with different polarizer orientations (V=vertical, H=horizontal).

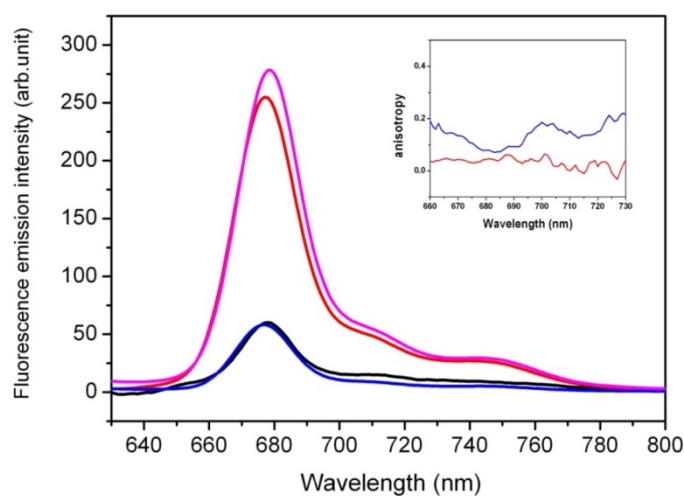

**Figure S2:** Steady-state fluorescence emission spectra of free ZnPc in DMSO (red trace), ZnPc/SC16OH nanoassemblies in DMSO (violet trace), ZnPc/SC16OH nanoassemblies in CHCl<sub>3</sub> (black trace) and ZnPc/SC16OH nanoassemblies in water (blue trace). ZnPc concentration was fixed at 0.25  $\mu\text{g/mL}$  in all the dispersions,  $\lambda_{\text{exc}} = 600 \text{ nm}$ . In the inset the anisotropy of ZnPc in DMSO (red trace) and ZnPc/SC16OH nanoassemblies in CHCl<sub>3</sub> (blue trace) is reported.

**S3.** Overall properties of Nile Red/SC16OH nanoassembly (Nr/SC16OH). SD was calculated on three different batches.

---

|                                      | Nr/SC16OH                   |
|--------------------------------------|-----------------------------|
| Nile Red (% w/w)                     | 0.2                         |
| Yield (%)                            | 75                          |
| Mean D <sub>H</sub> (nm ± SD)        | 195±8                       |
| P.I.                                 | 0.198                       |
| Zeta Potential (mV ± SD)             | -28.3±3.5                   |
| Nile Red Actual loading <sup>a</sup> | 0.199 ± 0.03<br>(71.2± 4.2) |
| (Ent. Efficiency <sup>b</sup> )      |                             |

---

<sup>a</sup>Actual loading is expressed as the amount of Nile Red (mg) encapsulated per 100 mg of nanoassembly; <sup>b</sup> ratio between actual and theoretical loading x 100.

## References

- (1) N. Angelini, N. Micali, V. Villari, P. Mineo, D. Vitalini, E. Scamporrino, *Phys. Rev. E* 2005, **71**, 021915.
- (2) A. Mazzaglia; N. Micali N.; L. Monsù Scolaro. Molecular recognition by means of photophysical investigation, in *Cyclodextrins Materials: Photochemistry, Photophysics and Photobiology*, Ed. Abderrazzak Douhal, Elsevier, Amsterdam, 2006, 203-222
- (3) J. R. Lackowicz, *Principles of Fluorescence Spectroscopy*, Kluwer Academic, Plenum Publisher, New York 1999.
